# Supplementary material for: Ground-penetrating radar reveals ice thickness and undisturbed englacial layers at Kilimanjaro's Northern Ice Field
Source: Copernicus journal article supplement (doi:10.5194/tc-11-469-2017), 2017-02-09
Supplement: Supplementary file 1 [file tc-11-469-2017-supplement.pdf]

Supplement of The Cryosphere, 11, 469–482, 2017  
<http://www.the-cryosphere.net/11/469/2017/>  
doi:10.5194/tc-11-469-2017-supplement  
© Author(s) 2017. CC Attribution 3.0 License.

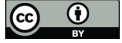

The Cryosphere  Open Access

*Supplement of*

## **Ground-penetrating radar reveals ice thickness and undisturbed englacial layers at Kilimanjaro's Northern Ice Field**

**P. Bohleber et al.**

*Correspondence to:* Pascal Bohleber ([pascal.bohleber@iup.uni-heidelberg.de](mailto:pascal.bohleber@iup.uni-heidelberg.de))

The copyright of individual parts of the supplement might differ from the CC-BY 3.0 licence.

a) Profile A

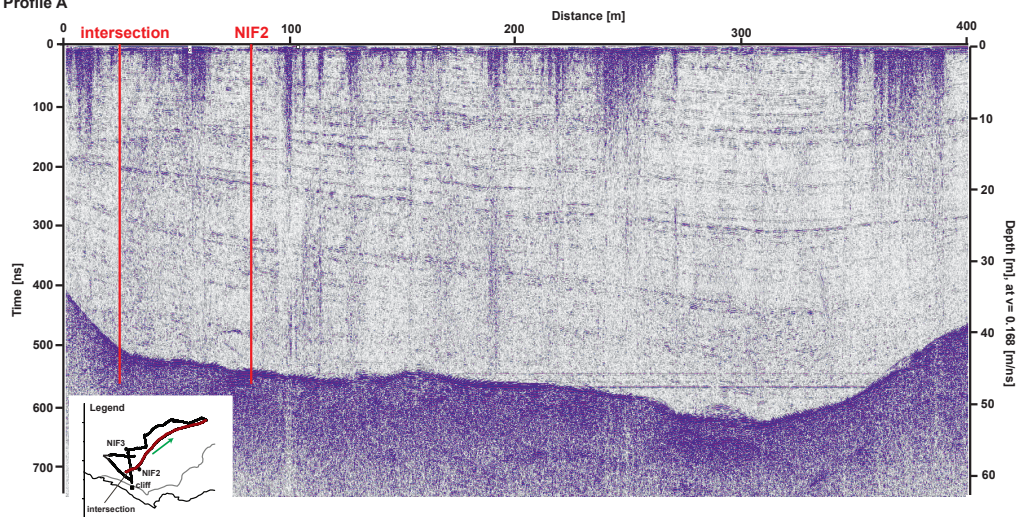

b) Profile B

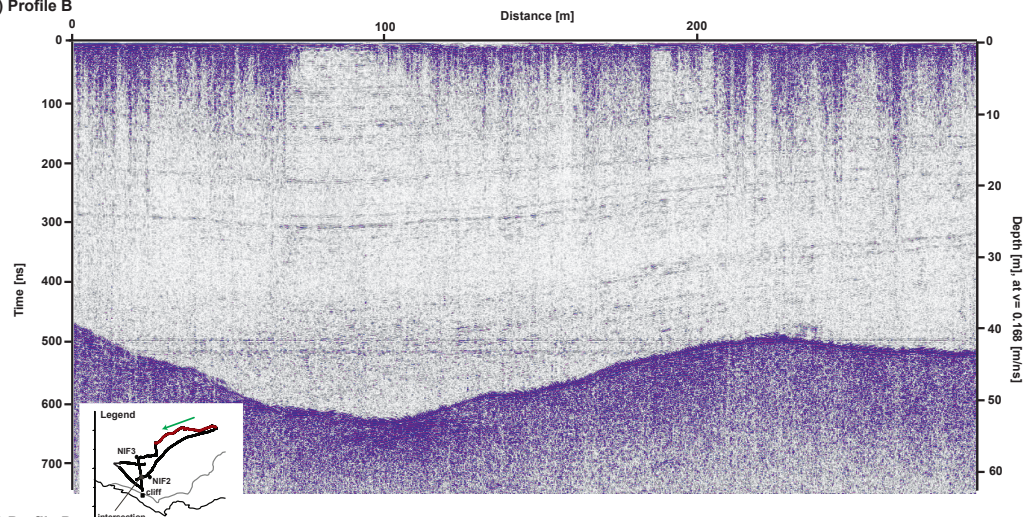

c) Profile C

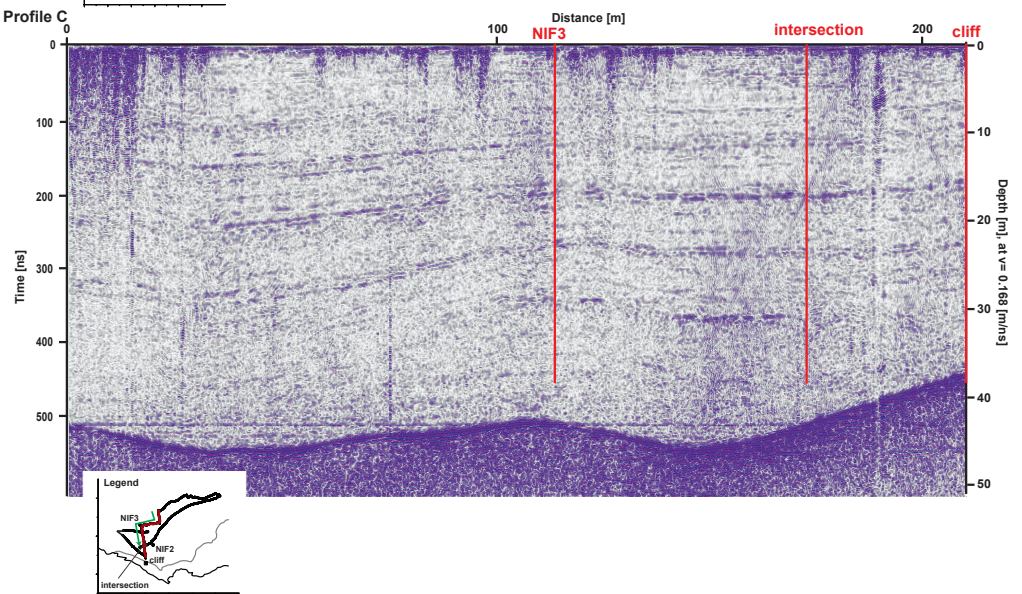

d) Profile D

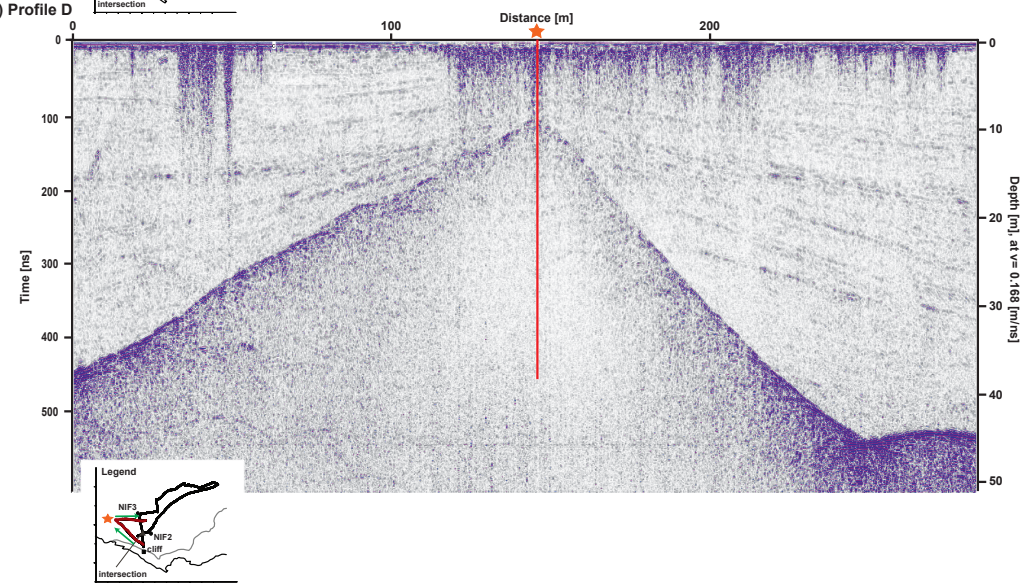

Supplementary Figure 1: Compilation of all recorded 200 MHz profiles shown as processed data. The data is shown in individual segments with the position marked as a red line in the legend. The green arrow indicates the direction of measurement the profile, corresponding to going from left to right in the radargrams. Also shown are the approximate positions of NIF2, NIF3 and the intersection (see Figure 4). The grey curve in the legend shows the location of a tabular cliff.
